RESEARCH ARTICLE

# Diagnostic value of STAF score in combination with D-dimer in cardioembolism

Li-Bin Liu<sup>1</sup>, Ya-Dong Guo<sup>1,2</sup>, An-Ding Xu<sup>2</sup>, Jie-Xi Zhong<sup>1</sup>, Wen-Yan Zhuo<sup>1\*</sup>

**1** Department of Neurology, Zhuhai Hospital of Jinan University, Zhuhai, China, **2** Department of Neurology, the First Affiliated Hospital of Jinan University, Guangzhou, China

These authors contributed equally to this work.

\* [zhuhaizwy@163.com](mailto:zhuhaizwy@163.com)

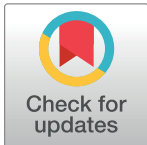

## Abstract

The aim of this study was to evaluate the diagnostic value of the Score for the Targeting of Atrial Fibrillation (STAF) in combination with the serum D-dimer (DD) levels in cardioembolism (CE). This study was a retrospective case-only study, consecutively including patients with acute ischemic stroke. All patients were evaluated following the STAF scoring criteria and were classified according to the Trial of ORG 10172 in Acute Stroke Treatment (TOAST) etiology classification criteria. A total of 317 patients were enrolled, including 37 CE cases (11.67%). STAF  $\geq 5$  showed a sensitivity of 89% and a specificity of 91% for the diagnosis of CE, whereas DD  $> 791.30$  ng/mL had a sensitivity of 58% and a specificity of 78%. When the STAF was used in combination with the DD level, the sensitivity was 95%, and the specificity was 100%. STAF score is an excellent tool for the diagnosis of CE when combined with DD, and can facilitate the etiological classification of acute ischemic stroke.

## OPEN ACCESS

**Citation:** Liu L-B, Guo Y-D, Xu A-D, Zhong J-X, Zhuo W-Y (2018) Diagnostic value of STAF score in combination with D-dimer in cardioembolism. PLoS ONE 13(10): e0204838. <https://doi.org/10.1371/journal.pone.0204838>

**Editor:** Xiongwen Chen, Temple University, UNITED STATES

**Received:** December 21, 2017

**Accepted:** September 14, 2018

**Published:** October 1, 2018

**Copyright:** © 2018 Liu et al. This is an open access article distributed under the terms of the [Creative Commons Attribution License](https://creativecommons.org/licenses/by/4.0/), which permits unrestricted use, distribution, and reproduction in any medium, provided the original author and source are credited.

**Data Availability Statement:** All relevant data are within the paper and its Supporting Information files.

**Funding:** This study was supported by the Medical Scientific Research Fund of Zhuhai, China (Project No. 20181117A010020).

**Competing interests:** The authors have declared that no competing interests exist.

## Introduction

Ischemic stroke can be divided into two types according to their etiology: cardioembolism (CE) and non-cardioembolic stroke. These two types of ischemic stroke have significantly different treatment regimens, especially in the choice of secondary prevention strategies. Therefore, early classification of acute ischemic stroke patients based on etiology facilitates the selection of appropriate secondary prevention strategies. However, precise etiological classification depends heavily on the perfect auxiliary examination. Moreover, CE has a lower diagnostic rate and a higher missed diagnosis rate in Chinese clinical practice than abroad. This disparity can largely be attributed to this dearth of targeted assessments. A reliable tool for the preliminary differential diagnosis of the etiological type is needed to guide further targeted testing and to determine the CE diagnosis, which will greatly improve the diagnostic rate of CE.

No preliminary differential diagnostic method has been broadly proven to be highly effective for the diagnosis of CE. Recent studies have shown that the Score for the Targeting of Atrial Fibrillation (STAF) can be used for initial screening for the presence of atrial fibrillation (AF) in patients with ischemic stroke [1], especially for occult paroxysmal atrial fibrillation [2], and has shown good result in the differential diagnosis of CE [3]. However, the effectiveness of

this scoring system requires further confirmation [4,5]. The serum biochemical indicator D-dimer (DD) has also shown a certain value for CE diagnosis. Nevertheless, the cut-off value and diagnostic value are inconsistent in several studies [6–8]. Our previous study [9] showed that  $DD > 791.30$  ng/mL had a sensitivity of 58% and a specificity of 78% for the diagnosis of CE. Considering the limited diagnostic value of the single test available for the initial identification of CE at present, the use of a combination of tests may improve the diagnostic accuracy. The STAF score and serum DD levels are readily obtained from patients at an early time point during their hospital stay. To improve the diagnostic rate of CE, this study mainly employed receiver operating characteristic (ROC) curve analysis and a combination of tests to evaluate the diagnostic value of STAF score and its combination with DD for CE based on a database from our previous study [9].

## Subjects and methods

### Subjects

As described in detail previously [9], this retrospective, case-only study was approved by the medical ethics committee of the First Affiliated Hospital of Jinan University, Guangzhou. Written informed consent was not obtained and the patients' records/information were anonymized and de-identified prior to analysis. We consecutively enrolled patients with acute ischemic stroke hospitalized in the Department of Neurology at the First Affiliated Hospital of Jinan University from January 2009 to December 2010. All patients had been discharged, and were identified the etiological subtypes before hospital discharge.

**Inclusion criteria.** Patients were chosen (1) whose cases conformed to the diagnostic criteria of the 2014 China cerebrovascular disease diagnosis and treatment guidelines for ischemic stroke; (2) whose time of stroke onset was not more than 7 days prior to inclusion; and (3) who had no history of ischemic stroke within the previous 6 months.

**Exclusion criteria.** Patients were excluded if they (1) were below 18 years of age; (2) had a diagnosis of hemorrhagic stroke and transient ischemic attack; (3) had systemic infections, autoimmune diseases, malignancies, serious liver or kidney diseases, heart failure, blood disorders, or other systemic thromboembolic pathologies; (4) had experienced a myocardial infarction, acute trauma, or surgery within the previous three months; (5) took long-term antithrombotic drugs (including anti-platelet drugs, anticoagulants, fibrinolytics) and statins lipid-lowering drugs, inflammation inhibitors, immunosuppressive agents or hormones); or (6) underwent thrombolytic therapy after admission.

### Methods

#### Collection of general data

All of the patients' data were collected from their medical records, including all of the demographic data (e.g., gender and age), the history of their present illness, National Institutes of Health Stroke Scale (NIHSS) score, all imaging information, including routine electrocardiogram (ECG), 24-hour Holter ECG, transthoracic echocardiography (including left atrial size), transesophageal echocardiography, ECG monitoring results and laboratory tests, including serum DD, blood lipids, blood glucose.

#### Specimen detection method

To determine DD levels in the sera, 4 mL of fasting cubital venous blood was collected from each patient in the morning after the day they were admitted to the hospital, anticoagulated using sodium citrate, and then centrifuged at 3000 r/min for 10 minutes for the isolation of

serum. DD levels were measured with a kit and immunoturbidimetry using an automatic biochemical detector which were both produced by Beijing Leadman Biochemistry Co., Ltd.

### STAF and ischemic stroke classification

The STAF score were obtained from all patients strictly following the scoring criteria [1]; the specific scoring items were shown in Table 1. Left atrial enlargement was defined as a left atrial diameter greater than 35 mm in transthoracic echocardiography in accordance with the criteria set by the Society of Diagnostic Medical Sonography in the United States [10]. Atherosclerotic stroke of the large arteries and occlusive stroke of the small arteries were absent according to the Trial of ORG 10172 in Acute Stroke Treatment (TOAST) etiology classification due to the lack of vascular etiology. All patients were classified according to the TOAST etiology classification criteria [11] and divided into five types: large-artery atherosclerosis (LAA), cardioembolism (CE), small-arteryocclusion (SAA), stroke of other determined etiology (SOE), and stroke of undetermined etiology (SUE). The STAF score and serum DD levels were compared between these subtypes.

### Statistical analysis

The SPSS13.0 statistical software was used to analyze all of the data. First, all of the patients' general data were analyzed; the chi-square test was used for the counted data, and an analysis of variance or a rank sum test was used to compare the measured data. The STAF score and DD levels had skewed distributions in each subtype and were expressed using median and quartiles. A two-sample or multi-sample rank sum test was used to compare differences between the groups. A ROC curve was used to determine the cut-off value and its sensitivity and specificity and to evaluate the authenticity and accuracy of the CE diagnosis. Combined test methods were used when CE was diagnosed based on two parameters.

## Results

### Baseline data

As described in detail from our previous study[9], there were a total of 317 patients studied (Table 2), including 202 cases of males (63.72%) and 115 cases of females (36.28%), with an average age of  $64.91 \pm 12.33$  years. The SOE cases were not included in the statistical analysis due to their small number. As shown in Table 2, no statistically significant difference was observed in the presence of diabetes, LDL-C levels, the proportion of smokers, or alcohol

**Table 1. Criteria and scoring for the STAF score.**

| Criteria               |     | Points |
|------------------------|-----|--------|
| Age, y                 | >62 | 2      |
|                        | ≤62 | 0      |
| Baseline NIHSS score   | ≥8  | 1      |
|                        | <8  | 0      |
| Left atrial dilatation | Yes | 2      |
|                        | No  | 0      |
| Vascular etiology      | Yes | 0      |
|                        | No  | 3      |
| Total                  |     | 0 to 8 |

<https://doi.org/10.1371/journal.pone.0204838.t001>

**Table 2. Baseline data of various stroke subtypes.**

| Baseline parameters     | LAA             | CE             | SAA            | SOE           | SUE            | Total           | P Value |
|-------------------------|-----------------|----------------|----------------|---------------|----------------|-----------------|---------|
| Number                  | 162<br>(51.10%) | 37<br>(11.67%) | 62<br>(19.56%) | 3<br>(0.95%)  | 53<br>(16.72%) | 317             | 0.000   |
| Males                   | 108<br>(66.67%) | 13<br>(35.14%) | 42<br>(67.74%) | 2<br>(66.67%) | 37<br>(69.81%) | 202<br>(63.72%) | 0.002   |
| Age, years<br>(mean±SD) | 65.70±10.64     | 68.73±14.24    | 62.44±11.97    | 39.33±22.19   | 64.17±13.72    | 64.91±12.33     | 0.000   |
| Hypertension            | 146<br>(90.12%) | 22<br>(59.46%) | 54<br>(87.10%) | 1<br>(33.33%) | 44<br>(83.02%) | 267<br>(84.23%) | 0.000   |
| Diabetes                | 44<br>(27.16%)  | 6<br>(16.22%)  | 15<br>(24.19%) | 0             | 13<br>(24.53%) | 78<br>(24.61%)  | 0.581   |
| LDL-C<br>(mmol/L)       | 2.97±0.73       | 2.57±0.81      | 3.01±0.78      | 1.92±0.62     | 2.80±0.79      | 2.89±0.77       | 0.463   |
| Smoking                 | 64<br>(39.51%)  | 9<br>(24.32%)  | 26<br>(41.94%) | 1<br>(33.33%) | 19<br>(35.85%) | 119<br>(37.54%) | 0.308   |
| Drinking                | 24<br>(14.81%)  | 2<br>(5.41%)   | 7<br>(11.29%)  | 0             | 8<br>(15.09%)  | 41<br>(12.93%)  | 0.438   |

<https://doi.org/10.1371/journal.pone.0204838.t002>

consumption among the various subtypes. The proportion of patients with hypertension was higher in the LAA group, and the proportion of females was higher in the CE group.

### Specific results of classification

As described in detail from our previous study[9], all patients were classified into five subtypes, including 162 cases (51.10%) of LAA, 37 cases(11.67%) of CE, 62 cases (19.56%) of SAA, 3 cases (0.95%) of SOE, and 53 cases (16.72%) of SUE (Table 2). The 37 CE cases included 28 cases of patients with atrial fibrillation, 5 cases of patients with sick sinus syndrome, one patient who underwent mitral valve replacement surgery (without atrial fibrillation), one patient with a patent foramen ovale, one case of dilated cardiomyopathy and one case of mitral valve prolapse. Polycythemia vera, arteritis, arteriovenousmal formations and arteriovenous fistulae were observed in the three cases of SOE.

### STAF score for each subtype

Detailed results were shown in Table 3. The SOE group was not included in the statistical analysis because of the small number of cases. The SUE group included some cases with both LAA and CE and some cases in which the etiology could not be determined, so SUE was also excluded from the statistical analysis. The  $\chi^2 = 105.20$  and  $P = 0.000$  results from the multi-sample rank sum test indicated different STAF score among the subtypes; the highest score was observed with CE.

### ROC curve analysis of the CE diagnosis based on the STAF

To evaluate the diagnostic effect of the STAF for CE, its ROC curve was obtained using SPSS 13.0, and the cut-off value was determined. As shown in Fig 1 (Fig 1. Predictive value of the

**Table 3. STAF score for each subtype.**

|                             | AT        | CE    | SAA   |
|-----------------------------|-----------|-------|-------|
| STAF<br>(median, quartiles) | 2.9 (1.7) | 6 (2) | 2 (2) |

<https://doi.org/10.1371/journal.pone.0204838.t003>

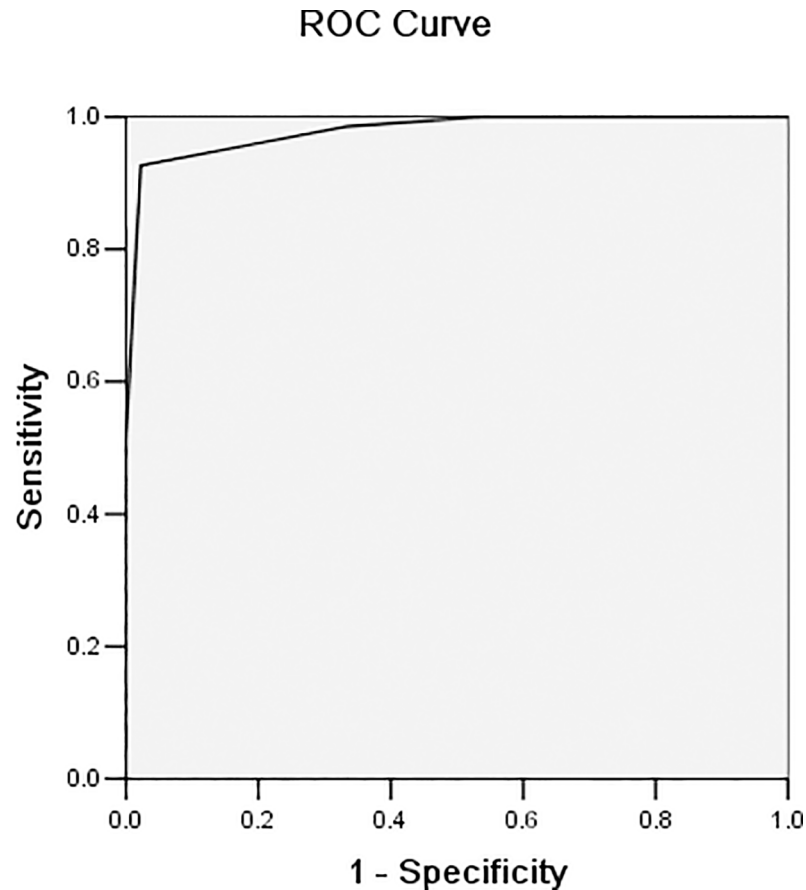

**Fig 1. Predictive value of the STAF presented as ROC curve for the diagnosis of CE.** The area under the ROC curve (AUC) was 0.929, which suggested good diagnostic value of the STAF for the diagnosis of CE.

<https://doi.org/10.1371/journal.pone.0204838.g001>

STAF presented as ROC curve for the diagnosis of CE), the area under the ROC curve (AUC) was 0.929 (generally considered to have diagnostic value when  $AUC > 0.5$ , low diagnostic value when  $AUC \leq 0.7$ , moderate diagnostic value when  $0.7 < AUC \leq 0.9$ , and high diagnostic value when  $AUC > 0.9$ ); thus, the result suggested high diagnostic value of the STAF for the diagnosis of CE. According to the cut-off value,  $STAF \geq 5$  has a sensitivity of 89%, specificity of 91%, positive predictive value of 90%, and negative predictive value of 93% for diagnosis of CE.

### STAF combined with DD for the diagnosis of CE

In our previous study [9], the cut-off value of DD used for the CE diagnosis was 791.30, which indicated that the CE type would be considered when DD was  $> 791.30$  ng/mL; however, the sensitivity was only 58%; specificity, 78%; positive predictive value, 26%; and negative predictive value, 93%. As shown above, poor sensitivity was observed when CE was diagnosed based on  $STAF \geq 5$  or  $DD > 791.30$  ng/mL alone, and the specificity of the latter measurement was also poor. However, STAF score could be used in combination with DD to improve the sensitivity and specificity, thereby increasing the diagnostic efficiency. If CE was diagnosed with STAF or DD greater than the cut-off value, then the two diagnostic methods could be used as parallel diagnostic tests to improve the test sensitivity (but reduced the specificity). The combined evaluation indicators shown in Table 4 were calculated as follows: sensitivity = 35/

**Table 4. Evaluation of STAF and DD in combined diagnosis of CE (parallel diagnostic tests).**

| STAF and DD Value                 | Number of CE | Number of non-CE | Total |
|-----------------------------------|--------------|------------------|-------|
| STAF ≥ 5 or/and DD > 791.30 ng/mL | 35           | 49               | 84    |
| STAF < 5 and DD < 791.30 ng/mL    | 2            | 175              | 177   |
| Total                             | 37           | 224              | 261   |

<https://doi.org/10.1371/journal.pone.0204838.t004>

$37 \times 100\% = 95\%$ , specificity =  $175/224 \times 100\% = 78\%$ , positive predictive value =  $35/84 \times 100\% = 42\%$ , and negative predictive value =  $175/177 \times 100\% = 99\%$ .

If CE was only diagnosed when both STAF and DD were greater than the cut-off values, then the two diagnostic methods could be used as serial diagnostic tests to improve the test specificity (but reduced the sensitivity). The combined evaluation indicators shown in Table 5 were calculated as follows: sensitivity =  $20/37 \times 100\% = 54\%$ , specificity =  $224/224 \times 100\% = 100\%$ , positive predictive value =  $20/20 \times 100\% = 100\%$ , and negative predictive value =  $224/241 \times 100\% = 92\%$ .

## Discussion

STAF is a scoring system [1] proposed by Suissa et al. in 2009 for screening for AF in ischemic stroke patients. Prediction of AF with  $STAF \geq 5$  resulted in a sensitivity of 89% and specificity of 88%, suggesting that such patients should be further subjected to multiple ECG examinations and repeated or extended 24-hour Holter ECG to evaluate the presence of paroxysmal or occult AF. The effectiveness of this test was confirmed in subsequent studies [2,5]. In 2016, Lin et al. [3] first found the excellent diagnostic value of STAF for the classification of acute ischemic stroke patients based on etiology.  $STAF \geq 5$  had a sensitivity of 90% and specificity of 95% for predicting CE and could be used as a simple and accurate tool for the diagnosis of CE. Similarly, our study confirmed the good value of STAF for the differential diagnosis of CE, with a sensitivity of 89%, specificity of 91%, positive predictive value of 90%, and negative predictive value of 93% when  $STAF \geq 5$  was used alone to predict CE. The DD level showed a sensitivity of 58%, a specificity of 78%, a positive predictive value of 26%, and a negative predictive value of 93% when  $DD > 791.30$  ng/mL was used alone to predict CE. To improve the accuracy, we utilized a test combination method to improve the combination sensitivity to 95%, with a combination specificity of 100% and a negative predictive value of the combination as high as 99%. The most valuable parameter of these evaluation indicators is the negative predictive value. For example, the negative predictive value was 93% for  $STAF \geq 5$ , indicating that 93% of the ischemic stroke patients with  $STAF < 5$  were definitely not the CE subtype.

The items involved in STAF score include patient data (age and NIHSS score at admission) and ultrasound radiography data (left atrial enlargement and vascular etiology), all of which are risk factors for AF [1]. This study suggests that STAF has a good diagnostic value for CE, which can be explained by the following aspects. First, the most common main risk factor for CE is AF [12], which is followed by myocardial infarction, heart failure, valvular heart disease,

**Table 5. Evaluation of STAF and DD in combined diagnosis of CE (series of diagnostic tests).**

| STAF and DD Value                 | Number of CE | Number of non-CE | Total |
|-----------------------------------|--------------|------------------|-------|
| STAF ≥ 5 and DD > 791.30 ng/mL    | 20           | 0                | 20    |
| STAF < 5 or/and DD < 791.30 ng/mL | 17           | 224              | 241   |
| Total                             | 37           | 224              | 261   |

<https://doi.org/10.1371/journal.pone.0204838.t005>

and sick sinus syndrome; these risk factors mostly occur in elderly patients [13–15]. In AF patients, approximately 70% have non-valvular AF, and 20% have valvular AF; the majority of the patients with non-valvular AF are elderly patients. Therefore, the elderly are more susceptible to CE. Second, compared to other types of ischemic stroke, CE has a more abrupt onset with more severe conditions and a higher NIHSS score [16,17]. Third, a number of recent studies have confirmed that left atrial enlargement is correlated with stroke and can increase the risk of stroke [18–20], especially the risk of CE [21]. As an important etiological factor in stroke of undetermined etiology [22] and an independent risk factor for CE and the recurrence of cryptogenic stroke [23], left atrial enlargement is associated with the stroke severity [24]. Additionally, left atrial enlargement may lead to local thrombosis [25]. Jaroch et al. found that a left atrial diameter greater than 51 mm was an independent risk factor for predicting thrombus in the left atrial appendage [26]. AF affects left atrial contraction and results in left atrial remodeling and then left atrial enlargement, leading to intra-atrial local blood stasis, which is most obvious in the left atrial appendage. Blood stasis results in raised local concentrations of coagulation factors, such as fibrinogen, leading to initiation of the coagulation process, induction of thrombosis, and possibly cerebral embolism [27–29]. Left atrial enlargement is also likely to increase the risk of AF [30]. In addition to AF, other organic heart lesions, such as myocardial infarction, atrial flutter, dilated cardiomyopathy, mitral valvular disease, valve replacement, atrial myxoma and patent foramen ovale, can cause left atrial remodeling and enlargement through affecting the afterload of the left atrium [31,32], and all of these conditions are risk factors for CE. In addition, the last item of STAF score (the absence of vascular etiology) refers to the exclusion of atherosclerotic stroke of the large arteries and occlusive stroke of the small arteries based on the TOAST etiological classification [1]. In summary, STAF score can be used to assist in the differential diagnosis of CE.

Multiple previous studies [6–8], including our previous study [9], have shown that the serum DD levels of patients with CE are significantly higher than those of patients with the other subtypes. The specific mechanisms of this finding have been previously explained and are not described here. DD is most likely a marker of CE, has a certain value for the diagnosis of CE, and may be used as an indicator for the exclusion of CE during early screening of ischemic stroke patients. At present, few studies have reported STAF score for the diagnosis of CE. This study has preliminarily demonstrated the diagnostic value of STAF. The combination of STAF and DD improved the diagnostic accuracy. However, further confirmation is needed with a large sample size. In this study, a serological indicator (DD), clinical data, and ultrasound radiography data (STAF score) were used in combination for the differential diagnosis of CE to identify patients who were suspected of or had a high risk of CE. This method provides guidance, especially for patients with cryptogenic or unexplained stroke, and offers strategic selection of targeted tests, such as transesophageal echocardiography, the transcranial Doppler (TCD) bubble test, long-term ECG monitoring, repeated 24-h Holter ECG, and cardiac magnetic resonance imaging (MRI), to improve the diagnostic rate of CE and expedite the most appropriate treatment and the initiation of secondary prevention programs.

## Conclusions

STAF score is a good tool for the diagnosis of CE that shows even better results when combined with DD and can facilitate the etiological classification of acute ischemic stroke.

## Supporting information

**S1 File. The raw data of AT patients.**  
(DOCX)

**S2 File. The raw data of CE patients.**  
(DOCX)

**S3 File. The raw data of SAA patients.**  
(DOCX)

## Acknowledgments

We express our sincere gratitude to all the neurologists and nurses in the Department of Neurology, the First Affiliated Hospital of Jinan University.

## Author Contributions

**Data curation:** Li-Bin Liu.

**Methodology:** Li-Bin Liu, Wen-Yan Zhuo.

**Supervision:** Jie-Xi Zhong.

**Writing – original draft:** Li-Bin Liu, Ya-Dong Guo.

**Writing – review & editing:** Li-Bin Liu, An-Ding Xu, Wen-Yan Zhuo.

## References

1. Suissa L, Bertora D, Lachaud S, Mahagne MH. Score for the targeting of atrial fibrillation (STAF): a new approach to the detection of atrial fibrillation in the secondary prevention of ischemic stroke. *Stroke*. 2009; 40(8): 2866–2868. <https://doi.org/10.1161/STROKEAHA.109.552679> PMID: 19461041
2. Suissa L, Mahagne MH, Lachaud S. Score for the targeting of atrial fibrillation: a new approach to diagnosing paroxysmal atrial fibrillation. *Cerebrovasc Dis*. 2011; 31(5):442–447. <https://doi.org/10.1159/000323852> PMID: 21346349
3. Lin SP, Long Y, Chen XH, Lin PY, Jiang HL. STAF score is a new simple approach for diagnosing cardioembolic stroke. *Int J Neurosci*. 2016; 25:1–6.
4. Horstmann S, Rizos T, Güntner J, Hug A, Jenetzky E, Krumsdorf U, et al. Does the STAF score help detect paroxysmal atrial fibrillation in acute stroke patients? *Eur J Neurol*. 2013; 20(1): 147–152. <https://doi.org/10.1111/j.1468-1331.2012.03816.x> PMID: 22788524
5. Liu XY, Li YX, Fu YG, Cai YY, Zhang YS, Min JY, et al. The Value of the Score for the Targeting of Atrial Fibrillation (STAF) Screening in Acute Stroke Patients. *J Stroke Cerebrovasc Dis*. 2017; 26(6):1280–1286. <https://doi.org/10.1016/j.jstrokecerebrovasdis.2017.01.022> PMID: 28242246
6. Ageno W, Finazzi S, Steidl L, Biotti MG, Mera V, Melzi D'Eril G, et al. Plasma measurement of D-dimer levels for the early diagnosis of ischemic stroke subtypes. *Arch Intern Med*. 2002; 162(22): 2589–2593. PMID: 12456231
7. Montaner J, Perea-Gainza M, Delgado P, Ribó M, Chacón P, Rosell A, et al. Etiologic diagnosis of ischemic stroke subtypes with plasma biomarkers. *Stroke*. 2008; 39(8): 2280–2287. <https://doi.org/10.1161/STROKEAHA.107.505354> PMID: 18535284
8. Isenegger J, Meier N, Lämmle B, Alberio L, Fischer U, Nedeltchev K, et al. D-dimers predict stroke subtype when assessed early. *Cerebrovasc Dis*. 2010; 29(1): 82–86. <https://doi.org/10.1159/000256652> PMID: 19907168
9. Liu LB, Li M, Zhuo WY, Zhang YS, Xu AD. The role of hs-CRP, D-dimer and fibrinogen in differentiating etiological subtypes of ischemic stroke. *PLoS One*. 2015; 10(2): e0118301. <https://doi.org/10.1371/journal.pone.0118301> PMID: 25680111
10. Gardin JM, Adams DB, Douglas PS, Feigenbaum H, Forst DH, Fraser AG, et al. Recommendations for a standardized report for adult transthoracic echocardiography: a report from the American society of echocardiography's nomenclature and standards committee and task force for a standardized echocardiography report. *J Am Soc Echocardiogr*. 2002; 15: 275–90. PMID: 11875394
11. Adams HP Jr, Bendixen BH, Kappelle LJ, Biller J, Love BB, Gordon DL, et al. Classification of subtype of acute ischemic stroke. Definitions for use in a multicenter clinical trial. TOAST. Trial of Org 10172 in acute stroke treatment. *Stroke*. 1993; 24(1):35–41. PMID: 7678184



12. Wolf PA, Abbott RD, Kannel WB. Atrial fibrillation as an independent risk factor for stroke: the Framingham Study. *Stroke*. 1991; 22(8): 983–988. PMID: [1866765](#)
13. Ambrosy AP, Fonarow GC, Butler J, Chioncel O, Greene SJ, Vaduganathan M, et al. The global health and economic burden of hospitalizations for heart failure: lessons learned from hospitalized heart failure registries. *J Am Coll Cardiol*. 2014; 63(12):1123–1133. <https://doi.org/10.1016/j.jacc.2013.11.053> PMID: [24491689](#)
14. Nkomo VT, Gardin JM, Skelton TN, Gottdiener JS, Scott CG, Enriquez-Sarano M. Burden of valvular heart diseases: a population-based study. *Lancet*. 2006; 368(9540):1005–1011. [https://doi.org/10.1016/S0140-6736\(06\)69208-8](https://doi.org/10.1016/S0140-6736(06)69208-8) PMID: [16980116](#)
15. Go AS, Hylek EM, Phillips KA, Chang Y, Henault LE, Selby JV, et al. Prevalence of diagnosed atrial fibrillation in adults: national implications for rhythm management and stroke prevention: the AnTicoagulation and Risk Factors in Atrial Fibrillation (ATRIA) Study. *JAMA*. 2001; 285(18):2370–2375. PMID: [11343485](#)
16. Hong KS, Lee J, Bae HJ, Lee JS, Kang DW, Yu KH, et al. Greater stroke severity predominates over all other factors for the worse outcome of cardioembolic stroke. *J Stroke Cerebrovasc Dis*. 2013; 22(8): e373–380. <https://doi.org/10.1016/j.jstrokecerebrovasdis.2013.04.008> PMID: [23697762](#)
17. Arauz A1, Morelos E1, Colín J1, Roldán J2, Barboza MA1. Comparison of Functional Outcome and Stroke Recurrence in Patients with Embolic Stroke of Undetermined Source (ESUS) vs. Cardioembolic Stroke Patients. *PLoS One*. 2016; 11(11): e0166091. <https://doi.org/10.1371/journal.pone.0166091> PMID: [27832136](#)
18. Benjamin EJ, D'Agostino RB, Belanger AJ, Wolf PA, Levy D. Left atrial size and the risk of stroke and death. The Framingham Heart Study. *Circulation*. 1995; 92(4): 835–841. PMID: [7641364](#)
19. Di Tullio MR, Sacco RL, Sciacca RR, Homma S. Left atrial size and the risk of ischemic stroke in an ethnically mixed population. *Stroke*. 1999; 30(10): 2019–2024. PMID: [10512901](#)
20. Lai CL, Chien KL, Hsu HC, Su TC, Chen MF, Lee YT. Left Atrial Dimension and Risk of Stroke in Women without Atrial Fibrillation: The Chin-Shan Community Cardiovascular Cohort Study. *Echocardiography*. 2011; 28(10): 1054–1060. <https://doi.org/10.1111/j.1540-8175.2011.01489.x> PMID: [21988172](#)
21. Shin HY, Jeong IH, Kang CK, Shin DJ, Park HM, Park KH, et al. Relation between left atrial enlargement and stroke subtypes in acute ischemic stroke patients. *J Cerebrovasc Endovasc Neurosurg*. 2013; 15(3):131–136. <https://doi.org/10.7461/jcen.2013.15.3.131> PMID: [24167790](#)
22. Takoglu A, Can U. Left atrial dilatation in undetermined group according to TOAST classification: Echocardiographic assessment of stroke patients. *Turk J Med Sci*. 2013; 43(6): 957–962.
23. Yaghi S, Moon YP, Mora-McLaughlin C, Willey JZ, Cheung K, Di Tullio MR, et al. Left atrial enlargement and stroke recurrence: the Northern Manhattan Stroke Study. *Stroke*. 2015; 46(6):1488–1493. <https://doi.org/10.1161/STROKEAHA.115.008711> PMID: [25908460](#)
24. Kim TW, Jung Sw, Song IU, Koo J, Choi HS, Lee KS, et al. Left atrial dilatation is associated with severe ischemic stroke in men with non-valvular atrial fibrillation. *J Neurol Sci*. 2015; 354(1–2): 97–102. <https://doi.org/10.1016/j.jns.2015.05.008> PMID: [26001853](#)
25. Hoit BD. Left atrial size and function: role in prognosis. *J Am Coll Cardiol*. 2014; 63(6):493–505. <https://doi.org/10.1016/j.jacc.2013.10.055> PMID: [24291276](#)
26. Jaroch J, Kamińska-Kegel A, Brzezińska B, Kruszyńska E, Bociąga Z, Dudek K, et al. Predictors of left atrial appendage thrombogenic milieu in patients subjected to transesophageal echocardiography prior to cardioversion of persistent atrial fibrillation. *Pol Arch Med Wewn*. 2016; 126(1–2): 25–31. PMID: [26811148](#)
27. Alessie M, Ausma J, Schotten U. Electrical, contractile and structural remodeling during atrial fibrillation. *Cardiovasc Res*. 2002; 54(2): 230–246. PMID: [12062329](#)
28. Ferro JM. Brain embolism—Answers to practical questions. *J Neurol*. 2003; 250(2): 139–147. <https://doi.org/10.1007/s00415-003-1017-0> PMID: [12574943](#)
29. Castellano JM, Chinitz J, Willner J, Fuster V. Mechanisms of stroke in atrial fibrillation. *Card Electro Clin*. 2014; 6(1): 5–15.
30. Vaziri SM, Larson MG, Benjamin EJ, Levy D. Echocardiographic predictors of nonrheumatic atrial fibrillation. The Framingham Heart Study. *Circulation*. 1994; 89(2):724–730. PMID: [8313561](#)
31. Pritchatt AM, Mahoney DW, Rodeheffer RJ, Jacobsen SJ, Redfield MM. Left atrial remodeling associated with diastolic dysfunction: a population-based study. *J Am Coll Cardiol*. 2002; 39(2):276–278.
32. Lee Mi Ji, Park Sung-Ji, Hyo Yoon Chang, Hwang Ji-won, Ryoo Sookyoung, Kim Suk Jae, et al. Association of Left Atrial Enlargement with Cortical Infarction in Subjects with Patent Foramen Ovale. *J Stroke*. 2016; 18(3): 304–311. <https://doi.org/10.5853/jos.2016.00290> PMID: [27733026](#)
